# Supplementary material
Source: PubMed Central journal article supplement (PMC4764148)
Supplement: supp_db15-0713_DB150713SupplementaryData.pdf [file supp_db15-0713_DB150713SupplementaryData.pdf]

SUPPLEMENTARY DATA

**Supplementary Figure 1. Prox1 levels are high in peripheral islet cells and low in core islet cells.** **A-C:** Prox1 (green) was expressed in  $\epsilon$ -cells (ghrelin<sup>+</sup>, arrows in **A**),  $\delta$ -cells (somatostatin<sup>+</sup>, arrows in **B**), and PP cells (pancreatic polypeptide<sup>+</sup>, arrows in **C**) of pancreata of wild-type mice. **D:** Prox1 expression was high in peripheral islet cells (arrows) that include the small ghrelin<sup>+</sup> cell population (green) and low in core islet cells (arrowhead) in pancreata of wild-type mice. **D'**, Prox1 expression (red) was high in most islet cells in pancreata of *Pax4*-null mice. (Note that ghrelin<sup>+</sup> cells [green] are overabundant in islets of *Pax4* mutant mice [44].) Scale bars: 12.5  $\mu$ m (**A-C**) or 25  $\mu$ m (**D, D'**).

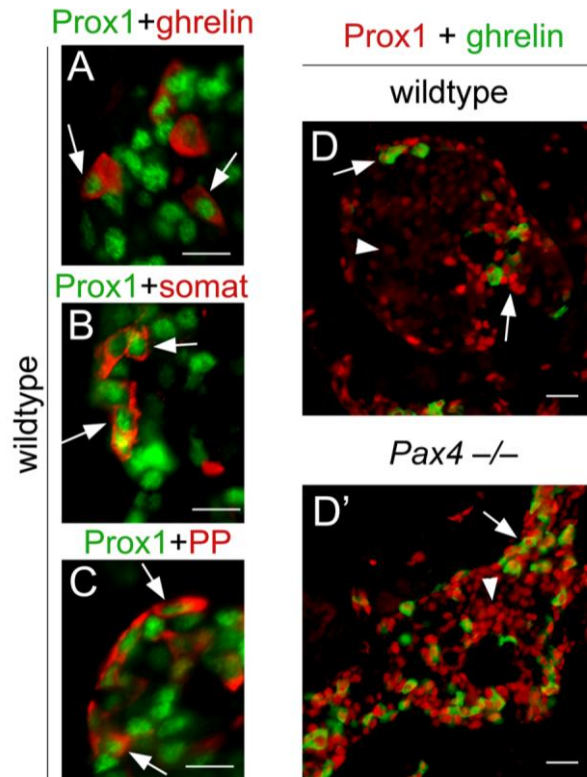

SUPPLEMENTARY DATA

**Supplementary Figure 2.  $\beta$ -gal expression is different in neonatal and adult insulin<sup>+</sup> cells in the pancreas of *Prox1*<sup>betaOE</sup> mice. A, B:**  $\beta$ gal expression (red and arrows) was very limited and GFP expression (green and arrowheads) was very extensive in pancreatic insulin<sup>+</sup> cells (blue) of *Prox1*<sup>endOE</sup> mice at P2 (**A**) and P7 (**B**). Notice that GFP and  $\beta$ gal immunoreactivities were mutually exclusive. **C:**  $\beta$ gal (red and arrow) colocalized extensively with insulin (blue) in the pancreas of *Prox1*<sup>endOE</sup> adult mice. Scale bars: 25  $\mu$ m.

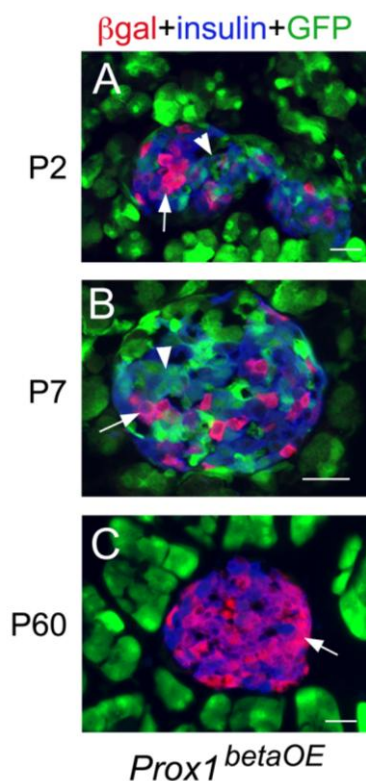

SUPPLEMENTARY DATA

**Supplementary Figure 3.  $\beta$ -gal is expressed in pancreatic and non-pancreatic tissues of *Prox1<sup>endOE</sup>* embryos at E14.5. A-E:** E14.5 *Prox1<sup>endOE</sup>* coronal sections stained for  $\beta$ gal uncovered expression of this protein (red and arrows) in numerous cells in the ventral thalamus (A), hindbrain (B) and spinal cord (C); in a few cell clusters in the developing heart (D); and in numerous cells in the pancreas (E). **F,G:** *Prox1* (red and arrows) had similar expression to  $\beta$ gal (A,C) in the ventral thalamus and spinal cord of E14.5 *Prox1<sup>endOE</sup>* embryos. **H, I:** *Prox1<sub>HIGH</sub>* (red and yellow arrows) colocalized extensively with  $\beta$ gal (blue) in pancreata of newborn (H) and adult (I) *Prox1<sup>endOE</sup>* mice. **I [inset]:** The expression of  $\beta$ gal in some acini indicated that they originate from *Neurog3<sup>+</sup>* precursors, and these cells also expressed ectopic *Prox1* (arrow). Scale bars: 25  $\mu$ m (H, I) or 100  $\mu$ m (A-G).

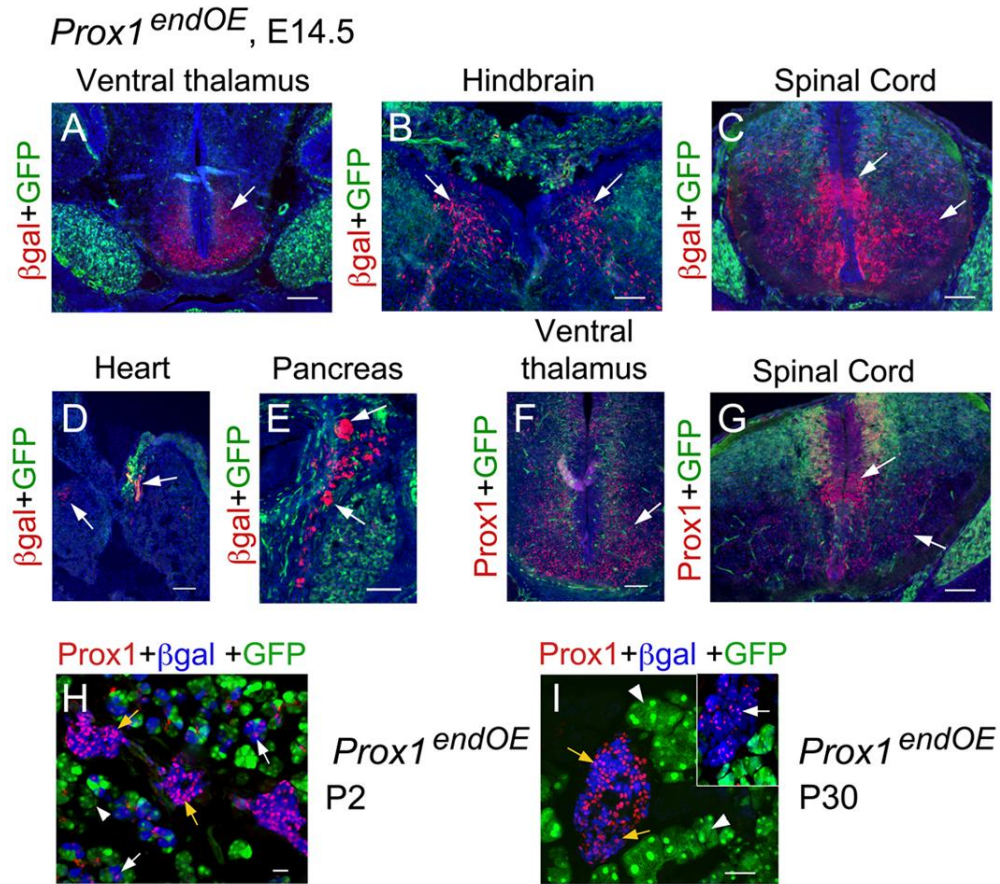

SUPPLEMENTARY DATA

**Supplementary Figure 4. Extensive Prox1 and  $\beta$ -gal immunoreactivity is detected in the islets of *Prox1<sup>endOE</sup>* adult mice. **A:** Prox1 overexpression decreased survival in *Prox1<sup>endOE</sup>* (HG) mice but not in *Prox1<sup>endOE</sup>* (NG) mice. **B, B':** Insulin (blue) and  $\beta$ -gal (red) colocalized extensively in the islets of *Prox1<sup>endOE</sup>* (HG) adult mice (**B**) and partially in the islets of *Prox1<sup>endOE</sup>* (NG) adult mice (**B'**). **C, C':** Cells expressing both  $\beta$ gal<sup>+</sup> (red) and high Prox1 (red) were abundant in pancreata of *Prox1<sup>endOE</sup>* (HG) mice (**C**) and moderate in pancreata of *Prox1<sup>endOE</sup>* (NG) mice (**C'**). Scale bars: 25  $\mu$ m.**

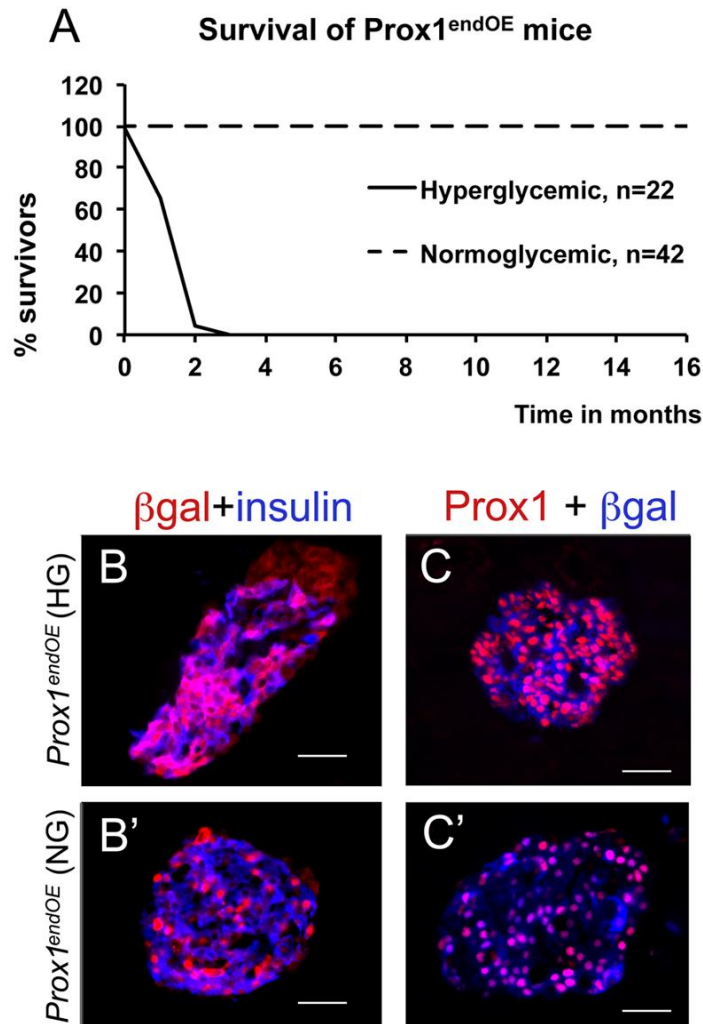

SUPPLEMENTARY DATA

**Supplementary Figure 5. Prox1 misexpression in  $\beta$ -cells changes gene expression profiles.** **A:** Heat maps showing the 50 most upregulated transcripts (left) and the 50 most downregulated transcripts (right), in pancreata of *Prox1<sup>endOE</sup>* mice at P15. (“C” are control [*Neurog3-cre*] triplicates and “M” are *Prox1<sup>endOE</sup>* triplicates.) **B:** Top downregulated pathways identified by Gene set enrichment analysis (GSEA) in *Prox1<sup>endOE</sup>* pancreata. **C:** GSEA showed that  $\beta$ -cell development and FGF signaling were amongst the top downregulated pathways in pancreata of *Prox1<sup>endOE</sup>* mice.

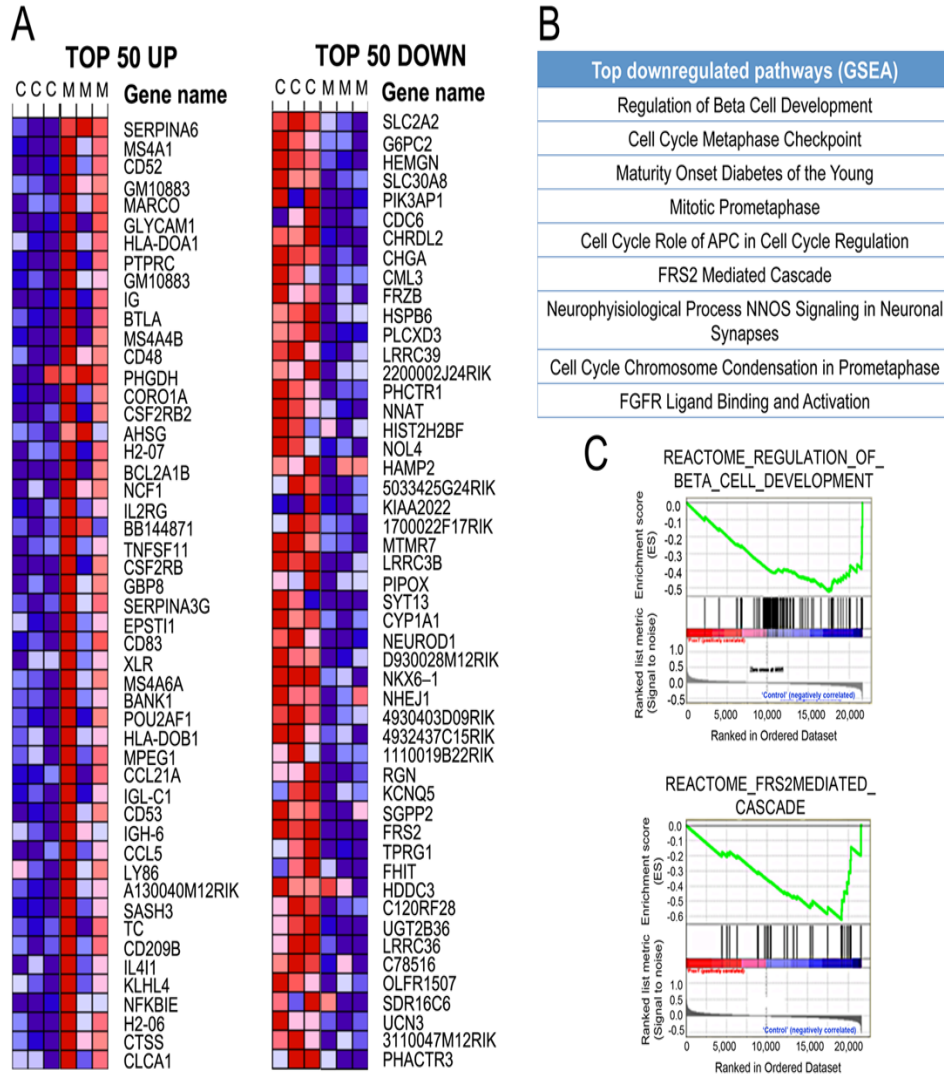

SUPPLEMENTARY DATA

**Supplementary Figure 6. Prox1 upregulation in murine  $\beta$ -TC6 cells does not affect *MafA* transcript levels.** **A:** Schematic representation of an approximately 10 kb mouse *MafA* upstream fragment containing putative Prox1-binding sites (+1 refers to the mouse *MafA* Transcription Start Site [TSS] reported by Raum et al [45]). The conserved site 12 in *MafA* region 3 (*Area 12*) has been reported to bind an ~80 kb activator that is different from Prox1 (46). The TGCCAAG (BS.III) Prox1-binding motif was conserved in *MafA* upstream sequences of rodents. **B:** Chromatin immunoprecipitation results showed significant enrichment of Prox1 to the predicted binding site 3 (BS.III) of *MafA* in the chromatin of  $\alpha$ TC-1 cells and lack of enrichment to the predicted *MafA* upstream binding sites in the chromatin of  $\beta$ -TC6 cells. Also, there was no significant enrichment of Prox1 in *MafA* area 12 or a distant area (NS or nonspecific). **C:** QPCR analysis of  $\beta$ -TC6 cells that were transduced with MSCV-GFP (control) or MSCV-Prox1 viruses and harvested 48 hours post-transduction to compare the expression of transcripts associated with  $\beta$ -cell function or transcripts encoding  $\beta$ -cell TFs. Data represent the mean ( $\pm$ SEM) of 3 independent experiments. (\* $P$ <0.05, \*\* $P$ <0.01.)

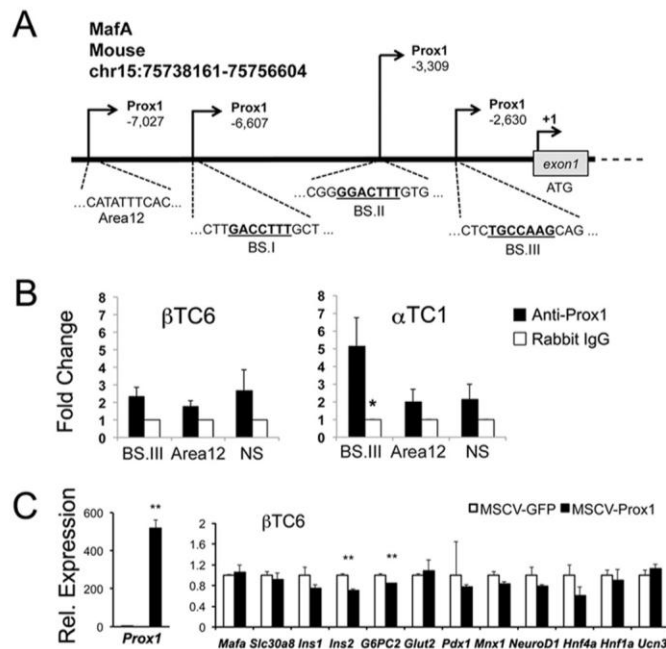



SUPPLEMENTARY DATA

**Supplementary Figure 7. Prox1 overexpression in  $\beta$ -cells of *Prox1<sup>endOE</sup>*(NG) mice does not affect the expression of MafA and MafB. A:** MafA (green and arrow) colocalized normally with Pdx1 (red) in core islet cells of *Prox1<sup>endOE</sup>*(NG) adult mice. **B:** MafB (green and arrowhead) was expressed in peripheral islet cells and excluded from Pdx1<sup>+</sup> (red and arrow) core islet cells in pancreata of *Prox1<sup>endOE</sup>*(NG) mice. Scale bars: 25  $\mu$ m.

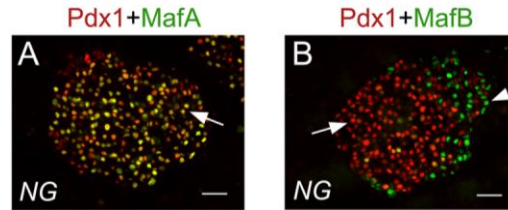

**Supplementary Figure 8. PROX1 is broadly expressed in human EndoC- $\beta$ H1 cells.** Immunodetection of PROX1 (red) and insulin (green) in cultures of human EndoC- $\beta$ H1 cells (DAPI [blue] was used to stain the cell nucleus). Scale bar: 25  $\mu$ m.

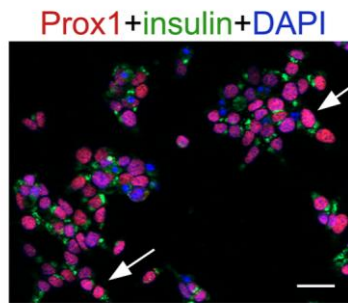

SUPPLEMENTARY DATA

**Supplementary Table 1. Antibodies used in this study.**

| <b>Antibody</b>        | <b>Species</b> | <b>Source</b>            | <b>Dilution</b> | <b>Application</b> |
|------------------------|----------------|--------------------------|-----------------|--------------------|
| Prox1                  | Goat           | R&D Systems              | 1:50            | IHC Frozen         |
| Prox1                  | Guinea Pig     | Rockland                 | 1:200           | IHC Frozen         |
| Prox1                  | Rabbit         | Millipore                | 1:1,000         | IHC Frozen         |
| Prox1                  | Rabbit         | Rockland custom antibody | 1 $\mu$ g       | ChIP               |
| Insulin                | Guinea Pig     | Dako                     | 1:250           | IHC Frozen         |
| Glucagon               | Rabbit         | Abcam                    | 1:500           | IHC Frozen         |
| Glucagon               | Guinea Pig     | Linco                    | 1:500           | IHC Frozen         |
| Somatostatin           | Rabbit         | Zymed                    | 1:100           | IHC Frozen         |
| Ghrelin                | Rabbit         | Phoenix Pharmaceuticals  | 1:300           | IHC Frozen         |
| Pancreatic Polypeptide | Rabbit         | Zymed                    | 1:50            | IHC Frozen         |
| $\beta$ -galactosidase | Chicken        | Abcam                    | 1:500           | IHC Frozen         |
| $\beta$ -galactosidase | Rabbit         | ICN                      | 1:5,000         | IHC Frozen         |
| MafA                   | Rabbit         | Bethyl Labs              | 1:500           | IHC Frozen         |
| MafB                   | Rabbit         | Bethyl Labs              | 1:200           | IHC Frozen         |
| Glut-2                 | Rabbit         | Alpha Diagnostics        | 1:200           | IHC Frozen         |
| Pdx1                   | Rabbit         | Abcam                    | 1:2,000         | IHC Frozen         |
| Pdx1                   | Goat           | Chris Wright lab         | 1:1,000         | IHC Frozen         |
| Ki-67                  | Rabbit         | Neomarkers               | 1:500           | IHC Frozen         |
| Synaptophysin          | Rabbit         | Zymed                    | 1:1,000         | IHC Frozen         |
| E-Cadherin             | Rat            | Sigma                    | 1:1,000         | IHC Frozen         |



SUPPLEMENTARY DATA

**Supplementary Table 2. Mouse Primers used for qPCR and ChIP experiments.**

| <b>Gene</b>         | <b>Forward primer</b>       | <b>Reverse primer</b>  |
|---------------------|-----------------------------|------------------------|
| <i>Prox1</i>        | CGCAGAAGGACTCTCTTTGTC       | GATTGGGTGATAGCCCTTCAT  |
| <i>Actb</i>         | CTAAGGCCAACCGTGAAAAG        | ACCAGAGGCATACAGGGACA   |
| <i>bgal</i>         | GCGTGGATGAAGACCAGC          | CGAAGCCGCCCTGTAAAC     |
| <i>Ins1</i>         | CAGAGAGGAGGTACTTTGGACTATAAA | GCCATGTTGAAACAATGACCT  |
| <i>Ins2</i>         | GAAGTGGAGGACCCACAAGTG       | CTGAAGGTCCCCGGGGCT     |
| <i>Gcg</i>          | CACGCCCTTCAAGACACAG         | GTCCTCATGCGTTCTGC      |
| <i>MafA</i>         | CTCCAGAGCCAGGTGGAG          | GTACAGGTCCCGCTCCTTG    |
| <i>MafB</i>         | TGAAAGCCCAGTGTTCTGC         | AGGGCTACCGGATGAGAAAC   |
| <i>Slc30a8</i>      | GCTGCTTCAGCAATATGCTTC       | CAGACTCCCAGCAACGTGT    |
| <i>Slc2a2/Glut2</i> | GGGCCATCAACATGATCTTC        | AATCATCCCGGTTAGGAACA   |
| <i>G6pc2</i>        | TGCCCTAAGCTACACCATCA        | AAAGGACCAGGTCAGTCTGTG  |
| <i>Pdx1</i>         | GAAATCCACCAAAGCTCACG        | CGGGTCCGCTGTGTAAG      |
| <i>Neurod1</i>      | CGCAGAAGGCAAGGTGTC          | TTTGGTCATGTTTCCACTTCC  |
| <i>Nkx6-1</i>       | CTGCACAGTATGGCCGAGATG       | CCGGGTATATGTGAGCCCAA   |
| <i>Nkx2-2</i>       | GAGTCACCGGACAATGACAAG       | TAGGTCTGCGCTTTGGAGAAG  |
| <i>Hnf4a</i>        | CTACGGAGCCTCGAGCTGT         | CCACACATTGTCGGCTAAAC   |
| <i>Hnf1a</i>        | CGCCTCCACCTGGTTAT           | ACTCCCATGCTGTTGATG     |
| <i>Rbp4</i>         | AAGGGACGAGTCCGTCTTCT        | TGAAAGTGCCCACCATGTC    |
| <i>UCN3</i>         | CCAGAGCAAAGTCCACTTACAG      | GCTTGTCTTGGACCTCCT     |
| <i>Mnx1</i>         | GAACACCAGTTCAAGCTCAACA      | GCTGCGTTTCCATTTTCATTCG |
| <i>UCN3</i>         | CCAGAGCAAAGTCCACTTACAG      | GCTTGTCTTGGACCTCCT     |
| <i>Rbp4</i>         | AAGGGACGAGTCCGTCTTCT        | TGAAAGTGCCCACCATGTC    |
| <i>Dnmt3a</i>       | ATTCCTTCTCACAACCCGC         | TACTTCCAGAGCTTCAGGGC   |
| <i>CyclinD1</i>     | GCGTACCCTGACACCAATCTC       | CTCCTCTTCGCACTTCTGCTC  |
| <i>FRS2</i>         | AGCTGTCCAGATAAAGACACTGT     | ATTTTACCAGTCCCGTTTCC   |
| <i>Fgf2</i>         | GCGACCCACACGTCAAATA         | CCGTCCATCTTCTTCATAGC   |
| <i>Fgf4</i>         | TGGGCCTCAAAGGCTTCG          | CGTCGGTAAAGAAAGGCACAC  |
| <i>Fgf7</i>         | TGGGCACTATATCTCTAGCTTGC     | GGGTGCGACAGAACAGTCT    |
| <i>MafA-BSIII</i>   | ACTCTGCCAAGCAGTCCCTA        | AGGGTGATCCCTGAAAGCAG   |
| <i>MafA-Area12</i>  | TTGCGACCATACGGCTATCA        | TGCTCAGTGGGGCTGTTAGA   |
| <i>MafA-NS</i>      | TATCTGTGGCCACCCTGAGA        | CAACAAACAAGGAGCCTCGC   |

SUPPLEMENTARY DATA

Human Primers used for qPCR in EndoC-βH1 cells

| Gene           | Forward primer             | Reverse primer             |
|----------------|----------------------------|----------------------------|
| <i>Prox1</i>   | CTTCACTATCCAGCTTGCAG       | CTACATTCAGATGGAGAAGTACG    |
| <i>MafA</i>    | TGAGCGGAGAACGGTGATTTCTAAGG | GGAACGGAGAACCCACGTTCAACGTA |
| <i>Slc30a8</i> | GATCCAGGCGACTGTGATGAT      | TGGCTTGTACTTCCTTGTGATTG    |
| <i>G6pc2</i>   | GCAGGGCTTTATGGGCTATT       | AGTTCATTTCTCCAAGGTCAG      |
| <i>NeuroD</i>  | ATTGCACCAGCCCTTCCTTTGATC   | TCGCTGCAGGATAGTGCATGGTAA   |
| <i>Glut1</i>   | GGACAGGCTCAAAGAGGTTAT      | AGGAGGTGGGTGGAGTTAAT       |
| <i>Glut2</i>   | CTAGTTGGGAGTCCTGTCAATTC    | CTAGGCAGAGCTGCGAATAAAA     |
| <i>MafB</i>    | ACCTTGGCTAAGGCGAGAGTAG     | CTTCAGCCTGGAGAGAAGTTACTC   |
| <i>Ins</i>     | AGAGGCCATCAAGCAGATCACTGT   | AGGTGTTGGTTCACAAAGGCTG     |
| <i>Hnf4a</i>   | CCCATCAGAAGGCACCAACC       | AGCGGCACTGGTTCCTCTTG       |
| <i>Hnf1a</i>   | GAGCAAGAGGCACTGATCC        | CTCCAGCTCTTTGAGGATGG       |
| <i>Nkx6-1</i>  | ATTCGTTGGGGATGACAGAG       | CGAGTCCTGCTTCTTCTTGG       |
| <i>Mnx1</i>    | AGAAGGCGGAAACCCACAGTGTT    | CAGCAGTTTGAACGCTCGTGACA    |
| <i>HK1</i>     | GCTCTCCGATGAAACTCTCATAG    | GGACCTTACGAATGTTGGCAA      |
| <i>Aldo B</i>  | CAAGGCTGCAAACAAGGAG        | CCCGTGTGAACATACTGTCTT      |
| <i>GPI</i>     | CCAATGGCCAGCATGCTTTT       | CCTCTGTCTGGGCAAGAAG        |
| <i>TPI1</i>    | ACTGCCTATATCGACTTCGCC      | AAGCCCCATTAGTCACTTTGTAG    |
| <i>Dnmt3a</i>  | ATTCCTTCTCACAACCCGC        | TACTTCCAGAGCTTCAGGGC       |
| <i>LDHa</i>    | GGAGATCCATCATCTCTCCC       | GGCCTGTGCCATCAGTATCT       |
| <i>UCN3</i>    | AGATACGTGTCCAAGCACA        | TTCTTCTCCAATTTGCGC         |
| <i>GCK</i>     | CCTTCTTCAGGTCTCTCTCC       | GATGGATCTCACAAGGAGCC       |
| <i>FGF7</i>    | AAAGGCTCACACACACACAC       | TCCATGTCTGTTGTCTGCCT       |
| <i>FRS2</i>    | TCCAGGATTTGCTGCTCAGA       | TTTCCGCTCTTCTTGCACAC       |
| <i>FGF4</i>    | GTTTCCCCTATGTGCAAGTCC      | GCGCTGCTGCGGTCCATGT        |
| <i>CCND1</i>   | GCACAGCTGTAGTGGGGTTCTAGGC  | CAGGCGCAAAGGACATGCACACGGC  |
| <i>CCND3</i>   | GCAGCGCCTTTCCCAACT         | TCAAAAGGAATGCTGGTGTATGTATC |
